# Supplementary material for: Carbohydrate antigen 125 and carcinoembryonic antigen in the differentiation of tuberculous peritonitis and peritonitis carcinomatosa
Source: PubMed Central journal article supplement (PMC5652837; doi:10.18632/oncotarget.17355), 2017-04-21
Supplement: oncotarget-08-78068-s001.pdf [file oncotarget-08-78068-s001.pdf]

## Carbohydrate antigen 125 and carcinoembryonic antigen in the differentiation of tuberculous peritonitis and peritonitis carcinomatosa

### SUPPLEMENTARY MATERIAL

**Supplementary Table 1: Literature review on CA 125 in TBP and malignancies**

| Author            | Research type                  | Patients                                                                   | CA 125 results (U/ml)                                    |
|-------------------|--------------------------------|----------------------------------------------------------------------------|----------------------------------------------------------|
| Bae, 2013 [12]    | Retrospective controlled study | TBP: 48 female<br>Ovarian Ca: 370 female                                   | TBP: 418 (range: 25-2702)<br>Ovarian Ca: 1002 (7-42600)  |
| Wang, 2012 [13]   | Retrospective controlled study | TBP: 30 female<br>PPC: 38 female                                           | TBP: 344.5 ± 255.0<br>PPC: 2625.5 ± 3923.7               |
| Oge, 2012 [14]    | Case series                    | TBP: 20 female                                                             | TBP: 289 ± 186.2                                         |
| Kaya, 2011 [15]   | Prospective controlled study   | TBP: 27 (6 male/ 21 female)<br>Ov CA: 24<br>Ga CA: 24 (13 male/ 11 female) | TBP: 229.2 ± 52<br>Ov CA: 2241 ± 565<br>Ga CA: 167 ± 138 |
| Choi, 2010 [16]   | Retrospective controlled study | TBP: 17 female<br>PPC: 20 female                                           | TBP: 448 (32-1725)<br>PPC: 1848 (42-14380)               |
| Sharma, 2010 [17] | Case series                    | TBP: 26 female                                                             | TBP: 594.22 ± 770.07                                     |
| Ulusoy, 2010 [18] | Case series                    | TBP: 8 female                                                              | TBP: 421 (107-725)                                       |
| Mas, 2000 [19]    | Case series                    | TBP: 6 male and 4 female                                                   | TBP: 475.80 ± 106.19                                     |
| Simsek, 1997 [20] | Prospective controlled study   | TBP: 2 male, 9 female<br>Healthy: 7 male, 13 female                        | TBP: mean 316.6<br>Healthy: 13.8                         |

Abbreviations: Ca, carcinoma; CA 125, carbohydrate antigen 125; Ga CA, gastric carcinoma; Ov CA, ovarian carcinoma; PPC, primary peritoneal carcinoma; TBP, tuberculous peritonitis.

### REFERENCES

- Bae SY, Lee JH, Park JY, Kim DM, Min BH, Rhee PL, Kim JJ. Clinical significance of serum CA-125 in Korean females with ascites. *Yonsei Med J.* 2013; 54: 1241-7.
- Wang D, Zhang JJ, Huang HF, Shen K, Cui QC, Xiang Y. Comparison between peritoneal tuberculosis and primary peritoneal carcinoma: a 16-year, single-center experience. *Chin Med J (Engl).* 2012; 125:3256-60.
- Oge T, Ozalp SS, Yalcin OT, Kabukcuoglu S, Kebapci M, Arik D, Isikci T. Peritoneal tuberculosis mimicking ovarian cancer. *Eur J Obstet Gynecol Reprod Biol.* 2012; 162: 105-8.
- Kaya M, Kaplan MA, Isikdogan A, Celik Y. Differentiation of tuberculous peritonitis from peritonitis carcinomatosa without surgical intervention. *Saudi J Gastroenterol.* 2011; 17: 312-7.
- Choi CH, Kim CJ, Lee YY, Kim JS, Song T, Park HS, Kim MK, Kim TJ, Lee JW, Lee JH, Bae DS, Kim BG. Peritoneal tuberculosis: a retrospective review of 20 cases and comparison with primary peritoneal carcinoma. *Int J Gynecol Cancer.* 2010; 20:798-803.
- Sharma JB, Jain SK, Pushparaj M, Roy KK, Malhotra N, Zutshi V, Rajaram S. Abdomino-peritoneal tuberculosis masquerading as ovarian cancer: a retrospective study of 26 cases. *Arch Gynecol Obstet.* 2010; 282:643-48.
- Ulusoy AN, Karabicak I, Dicle K, Kefeli M, Tosun M, Cetinkaya M, Alper T, Ustun C. Peritoneal tuberculosis in premenopausal patients with elevated serum CA 125. *Arch Gynecol Obstet.* 2010; 282:639-42.
- Mas MR, Comert B, Saglamkaya U, Yamanel L, Kuzhan O, Ateskan U, Kocabalkan F. CA-125; a new marker for diagnosis and follow-up of patients with tuberculous peritonitis. *Digestive & Liver Disease.* 2000; 32: 595-7.
- Simsek H, Savas MC, Kadayifci A, Tatar G. Elevated serum CA 125 concentration in patients with tuberculous peritonitis: a case-control study. *Am J Gastroenterol.* 1997; 92:1174-76.
